# Supplementary material
Source: publisher figshare collection journal article supplement (https://gsapubs.figshare.com/articles/dataset/_/15149043)
Supplement: Supplementary file 1 [file 2]

## Sheet: Table S2
Table A1. Chemical composition of volcanic glass of tephra layers discussed in Sarna-Wojcicki and others, this volume, arranged in groups in stratigraphic order from youngest at top (stratigraphic numbert 32) to olsest at botton (stratigraphic number 1).
There are 34 tephra layers in total (some numbers are duplicated, followed by a letter, a for exmple 18 and 18A). The groups represent those samples considered to be the same tephra layer within each sample group, based on chemical similarity as well
as other stratigraphic or numerical age evidence. The averages and standard deviations of these groups serev as guides for assignment or exclusion of new or other samples into a particular group.
TABLE S2. Location and chemical composition of volcanic glass of tephra layers discussed in Sarna-Wojcicki and others, this volume
Tephra are arranged in groups in stratigraphic order from youngest at top (stratigraphic number 32) to oldest at bottom (stratigraphic number 1). There are 34 tephra layers in total (some layer numbers are duplicated, followed by a letter, for example 18 and 18a where tephra are similar ages or the exact stratigraphic relationship is unclear). The groups represent those samples considered to be t…
Strat. No.	Comp. No.	Sample No.	Date anal.	SiO2	Al2O3	Fe2O3	MgO	MnO	CaO	TiO2	Na2O	K2O	T (rec. 100%)	Lat	Long
32		Paulina Lakes, Olema, ash bed, ~60 Ka
	4509	COLMA-1 T419-7	1999-11-05	75.79	13.25	1.62	0.09	0.04	0.49	0.17	4.39	4.16	100	37.7272	-122.506
	3150	CD10630 T296-6	1993-12-28	74.95	13.59	1.59	0.09	0.05	0.49	0.17	4.94	4.15	100.02	--	--
	3865	GL2-3.30 MAJOR T356-9	02/xx/1997	75.58	13.62	1.64	0.09	0.05	0.5	0.17	4.26	4.1	100.01	--	--
	1282	ASW61585-52B T100-4	1985-07-02	75.72	13.13	1.71	0.09	0.05	0.49	0.17	4.55	4.08	99.99	--	--
	3874	GL2-4.40 MAJOR T357-2	02/xx/1997	75.49	13.6	1.68	0.1	0.05	0.49	0.17	4.29	4.13	100	--	--
	3870	GL2-3.60 LO CA FR T356-10	02/xx/1997	75.61	13.57	1.69	0.09	0.04	0.49	0.17	4.23	4.11	100	--	--
	3881	GL2-7.24 MAJOR T357-5	02/xx/1997	75.63	13.59	1.69	0.09	0.05	0.49	0.17	4.17	4.12	100	--	--
	3879	GL2-5.76 MAJOR T357-4	02/xx/1997	75.59	13.57	1.67	0.09	0.04	0.48	0.17	4.27	4.13	100.01	--	--
	4593	GL-17177B T437-3	2000-03-02	75.71	13.29	1.65	0.09	0.04	0.49	0.16	4.51	4.05	99.99	--	--
	4752	RSA_CORE_A_DRIVE_10 T464-3	2001-06-27	75.38	13.13	1.67	0.1	0.05	0.51	0.17	4.83	4.17	100.01	37.0884	-122.259
	1391	ASW 61485-38B T109-10	1985-09-24	75.58	13.16	1.65	0.12	0.05	0.52	0.17	4.67	4.08	100	--	--
	5980	CL-1	2013-04-29	75.15	13.68	1.71	0.08	0.04	0.49	0.17	4.6	4.08	100	39.0950	-122.85
	3834	CD2-12.81M T354-6	01/xx/1997	75.46	13.57	1.7	0.1	0.04	0.48	0.17	4.44	4.04	100	--	--
	3478	RC21 T317-9 R HICA,FE	1995-04-11	74.8	13.77	1.7	0.1	0.05	0.49	0.17	4.7	4.23	100.01	--	--
	4	AH-4(2), T15-10	1978	75.24	13.67	1.69	0.11	0.06	0.5	0.17	4.49	4.06	99.99	39.0771	-122.812
	6020	T4Sta34.05 (pop3) T596-2	2013-09-24	75.13	13.63	1.73	0.08	0.05	0.49	0.17	4.83	3.9	100.01	--	--
	4356	SK-98-31 T399-1	1998-10-21	75.51	13.16	1.64	0.09	0.04	0.48	0.16	4.76	4.15	99.99	--	--
	3886	GL2-29.38 MAJOR T357-9	02/xx/1997	75.63	13.64	1.66	0.1	0.05	0.49	0.16	4.15	4.12	100	--	--
	5987	SK-98-31 T590-7, Paulina Lakes, proximal	2012-05-21	75.16	13.62	1.69	0.1	0.06	0.51	0.17	4.41	4.27	99.99	--	--
	2054	NC-88-ST T170-2	1988-09-03	75.16	13.28	1.7	0.09	0.04	0.49	0.16	5.02	4.07	100.01	--	--
	3858	GL1-0.435 LO CA T356-6	02/xx/1997	75.37	13.65	1.65	0.08	0.05	0.48	0.16	4.47	4.09	100	--	--
	2886	GL-3508 T266-4	1992-09-18	75.16	13.26	1.72	0.09	0.05	0.48	0.18	4.92	4.15	100.01	--	--
	1394	ASW-61485-38E T109-13	1985-09-24	75.87	12.97	1.65	0.08	0.04	0.52	0.16	4.47	4.24	100	--	--
	3862	GL2-1.55 POP2 T356-7	02/xx/1997	75.5	13.58	1.71	0.09	0.05	0.48	0.16	4.32	4.11	100	--	--
	4254	CD-2-11.98-12.3M-POP1 T388-9	1998-07-01	75.7	13.23	1.69	0.1	0.04	0.49	0.15	4.45	4.14	99.99	--	--
	2679	JW-72003 T236-7	1991-09-28	75.86	12.82	1.71	0.12	0.05	0.48	0.18	4.66	4.12	100	--	--
	3170	CD10605 (hife) T298-4 (2)	1994-02-14	74.92	13.74	1.68	0.09	0.04	0.48	0.16	4.82	4.06	99.99	--	--
	498	T60-1 ASH HOLE 4	1983-08-16	75.25	13.37	1.74	0.11	0.06	0.48	0.16	4.68	4.14	99.99	39.0759	-122.814
	1285	ASW61585-52C less silicic frac	1985-07-02	75.64	13.25	1.66	0.07	0.07	0.51	0.19	4.57	4.05	100.01	--	--
	2701	LM-LBC T245-3	1991-11-27	75.63	13.15	1.68	0.09	0.06	0.48	0.19	4.65	4.08	100.01	38.85990	-121.92330
	3	AH-4(1), T7-1, pd	1997-07-14	75.26	13.6	1.7	0.08	0.05	0.51	0.18	4.57	4.04	99.99	39.0771	-122.812
	3877	GL2-4.98 MAJOR T357-3	02/xx/1997	75.52	13.6	1.69	0.09	0.05	0.49	0.15	4.27	4.15	100.01	--	--
	3871	GL2-3.94 POP1 T357-1	02/xx/1997	75.57	13.6	1.7	0.09	0.04	0.49	0.15	4.28	4.08	100	--	--
	350	SKIN-1, T8-3	1979	75.44	13.37	1.69	0.09	0.04	0.47	0.19	4.54	4.16	99.99	38.0408	-122.788
	3863	GL2-2.10 POP1 T356-8	02/xx/1997	75.56	13.66	1.64	0.09	0.03	0.47	0.15	4.25	4.14	99.99	--	--
			Mean (35)	75.4434	13.4391	1.67971	0.0928571	0.0474286	0.490571	0.167714	4.52657	4.11286	100
			1 sigma	0.154452	0.190638	0.0296407	0.0112599	0.0130931	0.0158114	0.0192725	0.179518	0.0478091	0.00991031
31		Bend Pumice, Loleta, ash bed, ~435 Ka
	659	BPT-1, T68-5	1983-12-16	74.85	13.72	1.94	0.11	0.07	0.74	0.14	5.09	3.34	100	44.135	-121.335
	4440	RE98LC-Q277 T408-6	1999-05-30	74.67	13.89	1.92	0.11	0.07	0.75	0.14	5.23	3.23	100.01	--	--
	515	CL-0519(200-325), T63-13	1983-09-07	75.17	13.49	1.89	0.11	0.07	0.75	0.14	5.11	3.28	100.01	39.0822	-122.8514
	2847	BL-3487 T262-2	1992-07-29	74.44	13.91	1.92	0.11	0.05	0.75	0.13	5.52	3.16	99.99	--	--
	4456	JEO_7-16-98-2(2)_POP1 T411-2	1999-06-22	74.69	13.7	1.85	0.11	0.07	0.8	0.14	5.11	3.55	100.02	--	--
	92	DSDP-36-1-5(88cm), T47-5	1982	74.38	14.06	1.91	0.12	0.05	0.74	0.14	5.44	3.15	99.99	--	--
	514	CL-0519(100-200), T60-9	1983-08-16	74.69	14.06	1.96	0.12	0.07	0.75	0.14	5.05	3.18	100.02	39.0822	-122.8514
	1076	DSDP 36-1-6 T77-8	1984-07-30	74.82	13.63	1.95	0.11	0.08	0.79	0.15	5.22	3.25	100	--	--
	91	DSDP-36-1-5(57cm), T47-4	1982	74.21	14.07	1.98	0.12	0.06	0.73	0.14	5.42	3.27	100	--	--
	61	CRANNEL ASH-1, T23-13	1979-01-15	74.58	13.86	1.96	0.12	0.03	0.78	0.14	5.35	3.18	100	41.0354	-124.052
	6309	DSDP 36-1-5_57-59 T47-4J	2016-06-23	75.23	14.44	1.97	0.12	0.08	0.77	0.14	4.09	3.16	100	--	--
	4458	JEO_9-29-98-1(1) T411-3	1999-06-22	74.82	13.58	1.81	0.1	0.06	0.76	0.14	4.95	3.78	100	--	--
	351	SM-ASH-04, T11-7	1978	74.69	13.92	1.93	0.11	0.06	0.73	0.17	5.18	3.21	100	40.625	-124.217
	5981	DWR-DCRA-005-187.5 T593-8	2013-05-07	74.34	14.12	1.91	0.1	0.06	0.76	0.15	5.32	3.24	100	38.2105	-121.539
	5396	BPT-1 T530-2	2005-09-07	74.68	13.81	1.9	0.12	0.07	0.75	0.16	5.22	3.29	100	--	--
	6310	DSDP 36-1-5_88-98 T47-5J	2016-06-23	75.3	14.32	2.01	0.12	0.05	0.76	0.13	4.17	3.14	100	--	--
	2846	BL-3485 T262-1	1992-07-29	74.37	13.96	1.96	0.12	0.06	0.76	0.12	5.42	3.24	100.01	--	--
	352	SM-ASH-05, T11-8	1978	74.74	13.86	1.92	0.1	0.06	0.74	0.17	5.28	3.14	100.01	40.636	-124.187
	3118	BV-7567 T292-2	1993-12-17	73.02	14.75	1.93	0.11	0.07	0.87	0.15	5.38	3.72	100	--	--
	1497	GA18V184-1 T80-3	1984-07-20	74.85	13.72	1.98	0.13	0.07	0.8	0.15	4.77	3.53	100	--	--
	5929	DCA-DH-037-174.1 T587-9	2012-01-25	75.88	14.37	1.89	0.13	0.07	0.81	0.15	3.66	3.05	100.01	38.21528	-121.53813
	6312	DSDP 36-1-6_100-102 T77-8J	1984-05-21	74.82	14.19	1.97	0.14	0.09	0.79	0.13	4.54	3.33	100	40.9856	-130.116
			Mean (22)	74.6927	13.9741	1.93	0.115455	0.0645455	0.767273	0.143636	5.02364	3.29182	100.003
			1 sigma	0.733546	0.326641	0.0407567	0.0136423	0.0111803	0.0405518	0.015899	0.625315	0.20951	0.005
30		Rockland ash bed, ~600 Ka
	172	KA-1, T2-3	1978	77.62	12.82	0.9	0.16	0.03	0.88	0.15	4	3.43	99.99	37.7058	-122.4912
	331	RRG-2, T46-5	1982-1983	77.84	12.67	0.89	0.16	0	0.84	0.15	3.95	3.5	100	39.2405	-123.721
	1377	ASW-61085-18 T108-5	1985-09-24	77.69	12.84	0.9	0.16	0.01	0.91	0.15	3.78	3.55	99.99	--	--
	421	WO-1, T2-2	1978	77.61	12.82	0.86	0.16	0.03	0.83	0.15	3.99	3.55	100	37.4358	-122.2783
	3130	WM-B631 T293-5	1993-12-17	77.45	12.79	0.88	0.17	0.03	0.88	0.15	4.04	3.61	100	--	--
	340	SAM-10B, T40-5	--	77.8	12.74	0.88	0.16	0.02	0.82	0.15	3.91	3.52	100	--	--
	987	RC-7	--	77.94	12.74	0.88	0.17	0.03	0.87	0.15	3.81	3.41	100	--	--
	346	SC-6, 22-May-81	1981-05-22	78.01	12.71	0.9	0.16	0.03	0.9	0.15	3.58	3.56	100	37.2038	-121.7122
	206	LMT-3, T2, N-ASW-53	1978	77.78	12.79	0.89	0.18	0.02	0.9	0.15	3.94	3.35	100	36.8892	-121.519
	3143	WM-7780 T294-8	1993-12-18	77.61	12.78	0.87	0.17	0.03	0.87	0.15	3.87	3.66	100.01	--	--
	5983	DWR-DCN4-028-140.0 T593-7	2013-05-07	77.78	12.73	0.84	0.16	0.03	0.88	0.15	3.75	3.67	99.99	38.36833	-121.517
	347	SC-7	1981-05-22	78.15	12.64	0.87	0.16	0.07	0.86	0.15	3.57	3.53	100	37.2038	-121.7122
	3000	JY-92-11 T277-11	1993-05-03	77.46	12.93	0.86	0.17	0.04	0.85	0.15	3.93	3.61	100	--	--
	5986	DWR-DCR5-013-151.55 T539-10	2013-05-07	77.76	12.64	0.91	0.15	0.04	0.88	0.15	3.78	3.7	100.01	38.3494	-121.535
	164	JOD-20-6-78A(1), LAH-3, T11-12	--	77.78	12.77	0.86	0.16	0.03	0.86	0.16	3.78	3.6	100	--	--
	224	MMC-2, T2-4	--	77.66	12.76	0.86	0.17	0.03	0.87	0.16	3.93	3.57	100.01	--	--
	1041	JOD 19-7-83A, T78-2	1984-07-18	77.92	12.5	0.88	0.17	0.02	0.85	0.15	3.86	3.65	100	--	--
	1263	*TULE LAKE 2122 T94-1	1985-05-28	78.08	12.43	0.85	0.16	0.02	0.83	0.16	3.97	3.51	100.01	--	--
	3005	JY-92-62 T278-4	1993-05-03	77.45	12.93	0.83	0.17	0.04	0.86	0.15	3.92	3.66	100.01	--	--
	593	SC-5(2), T62-14	1983-08-25	78.02	12.45	0.87	0.18	0.04	0.87	0.15	3.88	3.55	100.01	37.2038	-121.7122
	2535	BEC-2 T224-2	1991-04-22	77.61	12.91	0.89	0.17	0.04	0.88	0.17	3.84	3.5	100.01	38.908	-122.038
	1176	RLA-WOL t89-5	1985-02-28	77.81	12.68	0.86	0.17	0.03	0.89	0.14	3.88	3.54	100	--	--
	989	RC-10	--	77.78	12.83	0.89	0.17	0.03	0.83	0.16	3.81	3.51	100.01	--	--
	3370	JY-91-6 T314-9	1994-11-23	77.44	12.82	0.91	0.17	0.03	0.89	0.17	3.96	3.62	100.01	--	--
	329	RPT(M)8, T1, N-ASW-11	1978?	78.32	12.17	0.87	0.16	0.02	0.9	0.15	3.7	3.71	100	40.439	-121.847
	1882	FHS-87-2A T150-2	1987-11-09	78.04	12.61	0.88	0.16	0.04	0.87	0.16	3.61	3.62	99.99	--	--
	1130	T1245 (Tulelake) T84-7 v. him	1984-12-03	78.14	12.36	0.87	0.17	0.04	0.86	0.16	3.89	3.51	100	--	--
	3138	JY-92-79 T294-4	1993-12-18	77.5	12.76	0.87	0.17	0.02	0.88	0.17	4.02	3.61	100	--	--
	961	DR-75	--	77.76	12.73	0.89	0.17	0.02	0.85	0.16	3.81	3.61	100	--	--
	5340	ADB-OM-T1 T524-1	2020-03-07	77.48	12.76	0.84	0.16	0.03	0.79	0.15	4.05	3.75	100.01	--	--
	5982	DWR-DCR3-013-133.75 T539-6	2013-05-07	77.9	12.79	0.86	0.16	0.03	0.89	0.16	3.6	3.62	100.01	--	--
	2534	BEC-1 T224-1	1991-04-22	77.7	12.82	0.87	0.18	0.03	0.9	0.16	3.86	3.47	99.99	38.908	-122.038
	1264	*TULE LAKE 2123 T94-2	1985-05-28	77.99	12.5	0.85	0.16	0.02	0.85	0.17	3.94	3.52	100	--	--
	5984	DWR-DCR5-013-136.0 T593-9	2013-05-07	77.91	12.72	0.89	0.15	0.03	0.88	0.16	3.66	3.6	100	38.3494	-121.535
	4397	RPT(M)20 T401-6	1998-12-03	78.04	12.5	0.89	0.17	0.02	0.87	0.15	3.63	3.73	100	40.4189	-121.864
	619	TULELAKE-291(2), T62-11	1983-08-25	78.21	12.43	0.87	0.17	0.04	0.85	0.16	3.8	3.47	100	--	--
	1132	T1403 (Tulelake) T84-9 v. hom	1984-12-03	78.17	12.29	0.88	0.17	0.03	0.86	0.16	3.86	3.57	99.99	--	--
	328	RPT(M)7, T2, N-ASW-93	1978	77.78	12.77	0.87	0.17	0.03	0.89	0.16	3.72	3.61	100	40.437	-121.861
	2764	#4074 T251-1	1992-02-27	77.76	12.58	0.88	0.17	0.02	0.88	0.17	3.93	3.63	100.02	--	--
	1881	FHS-87-2 T150-1	1987-11-09	78.27	12.44	0.85	0.17	0.04	0.86	0.15	3.66	3.55	99.99	--	--
	345	SC-5, 22-May-81	1981-05-22	78.07	12.61	0.91	0.17	0.05	0.96	0.15	3.59	3.49	100	37.2038	-121.7122
	330	RRG-1, T9-1	1905-06-01	77.73	12.77	0.86	0.16	0.03	0.86	0.18	3.88	3.53	100	40.693	-124.157
	2999	JY-92-9 T277-6	1993-05-03	77.36	12.97	0.86	0.17	0.03	0.85	0.16	3.93	3.68	100.01	--	--
	326	RPT(L)15, pum. dk. bulk, T46-7		77.65	12.68	0.93	0.17	0.02	0.93	0.16	3.83	3.62	99.99	40.35	-121.74
			Mean (44)	77.8143	12.6814	0.875455	0.166136	0.0297727	0.87	0.156136	3.83409	3.57409	100.001
			1 sigma	0.244525	0.178059	0.0208488	0.00689317	0.0110997	0.0293337	0.00813145	0.132881	0.0853534	0.00734243
29		Lava Creek B ash bed, ~630 Ka
	385	TECO-30A, T17-7	--	76.21	12.66	1.58	0.02	0.04	0.55	0.12	3.64	5.19	100.01	--	--
	3683	JRK-DV-77 #2 T339-9	1996-11-03	76.5	12.51	1.56	0.03	0.03	0.54	0.12	3.39	5.32	100	--	--
	389	TECO-30D, T17-11	--	75.95	12.76	1.64	0.02	0.03	0.55	0.12	3.44	5.49	100	--	--
	386	TECO-30B-1, T17-8	--	76.44	12.46	1.57	0.02	0.04	0.53	0.12	3.52	5.3	100	--	--
	5272	ORNA-1 T515-2	2004-08-24	76.67	12.41	1.58	0.02	0.03	0.53	0.12	3.57	5.06	99.99	--	--
	2072	CDH-D86-11B T172-3	1988-09-28	76.8	12.34	1.6	0.02	0.03	0.54	0.12	3.51	5.05	100.01	--	--
	5274	CDH-D56-11B T515-4	2004-08-24	76.63	12.43	1.65	0.03	0.04	0.55	0.12	3.58	4.97	100	--	--
	3494	JRK-DV-5 T323-4	1995-05-06	76.46	12.32	1.57	0.02	0.05	0.53	0.12	3.36	5.57	100	--	--
	4247	PC-EQ-1 T385-1	05/xx/1998	76.52	12.24	1.55	0.02	0.03	0.54	0.12	3.88	5.09	99.99	--	--
	1446	ORNA-1 T116-4	1985-01-27	76.79	12.27	1.58	0.02	0.03	0.53	0.12	3.61	5.07	100.02	--	--
	1455	ORNA-1 T116-4	1985-01-27	76.79	12.27	1.58	0.02	0.03	0.53	0.12	3.61	5.07	100.02	--	--
	4878	RK-SVR6_ALL T476-6	2002-04-02	76.75	12.09	1.62	0.02	0.03	0.55	0.12	3.77	5.04	99.99	--	--
	6102	MV-133A (Redwine UNR)	2015-06-01	76.9	12.23	1.55	0.02	0	0.56	0.12	3.19	5.44	100.01	--	--
	630	TULELAKE-329, T61-9	1983-08-17	76.5	12.45	1.66	0.02	0.05	0.54	0.12	3.6	5.06	100	--	--
	4197	PC-DQ-1 T384-10	04/xx/1998	76.23	12.38	1.57	0.02	0.03	0.55	0.11	3.93	5.17	99.99	--	--
	390	TECO-30E, T17-12	--	76.14	12.58	1.6	0.02	0.04	0.54	0.13	3.51	5.44	100	--	--
	4671	BL-00-47E T457-2	2001-01-18	76.83	12.3	1.54	0.02	0.04	0.52	0.12	3.55	5.08	100	--	--
	4512	IV-NIEP-5 T419-4	1999-11-05	77.33	11.93	1.55	0.02	0.06	0.53	0.12	3.34	5.13	100.01	--	--
	6024	JRK-DV-56 T599-10	2013-12-16	76.58	12.53	1.61	0.01	0.04	0.54	0.13	3.53	5.03	100	--	--
	2848	BL-3488 T262-3	1992-07-29	75.94	13.18	1.55	0.06	0.04	0.59	0.12	4.95	3.56	99.99	--	--
	388	TECO-30C, T17-10	--	76.24	12.63	1.63	0.02	0.05	0.56	0.11	3.55	5.21	100	--	--
	292	PICO-133C, T35-1	--	75.71	12.37	1.59	0.02	0	0.56	0.11	3.4	5.25	99.01	--	--
	391	TECO-30F, T17-13	--	76.23	12.63	1.6	0.02	0.03	0.52	0.13	3.59	5.26	100.01	--	--
	4348	CHIN-1 T396-1	1998-10-21	76.87	12.3	1.56	0.03	0.03	0.54	0.11	3.55	5.02	100.01	--	--
	5638	JC-108-LT10 T563-3	2008-09-25	77.74	12.57	1.62	0.03	0.04	0.54	0.11	2.66	4.69	100	--	--
	2466	T89-5/6 #2B T215-8	1990-09-25	77.11	12.1	1.51	0.02	0.03	0.52	0.12	3.49	5.1	100	--	--
	5640	JC-108-LT37 T563-5	2008-09-25	77.71	12.58	1.63	0.03	0.03	0.54	0.11	2.66	4.72	100.01	--	--
	5312	CHAMA-1 T518-7	2004-08-24	76.73	12.44	1.45	0.02	0.05	0.52	0.12	3.65	5.02	100	--	--
	5645	JC-LT4-T1 T563-10	2008-09-25	77.54	12.57	1.64	0.02	0.03	0.54	0.11	2.79	4.76	100	--	--
	2768	#4079 T251-5	1992-02-27	76.6	12.18	1.64	0.02	0.03	0.55	0.11	3.59	5.27	99.99	--	--
	3495	JRK-DV-13 T323-5	1995-05-06	76.52	12.39	1.61	0.02	0.03	0.53	0.11	3.55	5.25	100.01	--	--
	1432	ORNA-1 T114-13	1985-12-12	76.99	12.31	1.57	0.02	0.05	0.53	0.11	3.44	4.99	100.01	--	--
	392	TECO-30G, T17-14	--	76.75	12.66	1.72	0.03	0.03	0.55	0.13	2.78	5.36	100.01	--	--
	5313	CHAMA-2 T518-8	2004-08-24	76.69	12.4	1.55	0.03	0.04	0.53	0.11	3.58	5.07	100	--	--
	583	ORNA-1(2), T63-3	1983	76.96	12.15	1.51	0.03	0.04	0.51	0.12	3.56	5.12	100	--	--
	2754	BUR-760.8	--	76.48	12.28	1.79	0.02	0.05	0.56	0.12	3.32	5.37	99.99	--	--
	4700	REK-031194-1 T458-2	2001-02-12	77.04	12.17	1.55	0.02	0.04	0.54	0.11	3.49	5.03	99.99	--	--
	3685	JRK-DV-78 #2 T339-10	11/xx/1996	76.59	12.48	1.53	0.03	0.03	0.53	0.11	3.38	5.33	100.01	--	--
	2074	CDH-D88-23 T172-5	1988-09-28	76.9	12.36	1.54	0.03	0.03	0.53	0.13	3.5	4.99	100.01	--	--
	2267	T190-2 CAES#1 626.5	1989-05-10	76.9	12.35	1.55	0.01	0.02	0.53	0.11	3.53	4.99	99.99	--	--
	253	P5-23 T23-1	1981-03-13	76.69	12.27	1.71	0.02	0.04	0.57	0.13	3.72	4.84	99.99	36.0981	-119.56
			Mean (40)	76.6817	12.4032	1.59049	0.0229268	0.034878	0.54	0.118049	3.49415	5.09195	99.9773
			1 sigma	0.433358	0.216754	0.0611127	0.00782429	0.0116452	0.0153297	0.00678952	0.365007	0.314835	0.155081
28		Bishop Tuff, ash bed, ~774 Ka
	1029	FRIANT 9A T74-4	1984-06-22	77.42	12.57	0.71	0.03	0	0.44	0.07	3.86	4.91	100.01	37.0005	-119.70527
	33	BT-8(2), T20-2	1985-07-01	77.48	12.68	0.71	0.03	0.02	0.45	0.06	3.85	4.72	100	37.7167	-118.88416
	1021	O.L. 858.5 T75-9	1984-06-23	77.43	12.68	0.68	0.04	0.04	0.44	0.05	3.8	4.85	100.01	--	--
	5347	Th-1 (440') LoFe T524-8	2020-03-07	77.31	12.66	0.7	0.04	0.04	0.45	0.07	3.76	4.95	99.98	--	--
	3642	JRK-DV-42 T337-7	03/xx/1996	77.63	12.6	0.72	0.03	0.03	0.44	0.06	3.78	4.7	99.99	--	--
	2937	OL92-1030 T272-4 JEOL	1993-03-03	76.94	12.91	0.74	0.04	0.03	0.44	0.07	3.9	4.93	100	--	--
	4825	TECO-36 T472-1	2001-12-14	77.32	12.67	0.69	0.03	0.05	0.43	0.08	3.78	4.95	100	--	--
	1278	BT-7 BULK 200SEC CTS T20-1	1985-07-01	77.57	12.48	0.73	0.02	0.05	0.43	0.07	3.88	4.78	100.01	37.7167	-118.88416
	65	D77-2D, T31-6	--	77.39	12.66	0.73	0.03	0.05	0.45	0.07	3.72	4.89	99.99	--	--
	1682	R-86-Y1 T134-5	1986-11-25	77.78	12.52	0.7	0.04	0.04	0.44	0.05	3.75	4.68	100	--	--
	5346	TH-1 (420') T524-7	2020-03-07	77.24	12.75	0.74	0.04	0.04	0.44	0.06	3.91	4.77	99.99	--	--
	2005	FLV-57-CS T166-7	1988-07-19	77.34	12.71	0.69	0.02	0.04	0.44	0.07	3.69	4.98	99.98	--	--
	1277	BT-8 (2) BULK T20-2	1985-07-01	77.75	12.48	0.73	0.03	0.05	0.44	0.05	3.82	4.65	100	37.7167	-118.88416
	2939	OL92-1024 T273-4 JEOL	1993-03-03	76.86	13	0.7	0.03	0.03	0.44	0.05	4.04	4.85	100	--	--
	2462	SN-7 T215-4	1990-09-25	77.71	12.73	0.71	0.03	0.02	0.44	0.06	3.81	4.48	99.99	--	--
	2936	OL92-1029 T273-3 JEOL	1993-03-03	76.92	13.06	0.71	0.03	0.04	0.42	0.05	3.92	4.85	100	--	--
	4821	TECO-37 T471-7	2001-10-18	77.53	12.65	0.74	0.03	0.05	0.44	0.07	3.67	4.81	99.99	--	--
	2463	SN-8A T215-5	1990-09-25	77.92	12.6	0.71	0.03	0.02	0.44	0.05	3.86	4.37	100	--	--
	1892	YJC-1-87 T150-11	1987-11-09	77.28	12.91	0.73	0.04	0.05	0.44	0.07	3.74	4.75	100.01	--	--
	2941	OL92-1026 T273-6 JEOL	1993-03-03	76.96	12.93	0.69	0.03	0.03	0.45	0.08	3.97	4.87	100.01	--	--
	4854	EL-109-AV T474-3	2002-01-30	77.21	12.74	0.71	0.02	0.03	0.43	0.05	4.05	4.74	99.98	--	--
	3097	BT-14 T289-1	1993-09-24	77.21	12.78	0.75	0.03	0.04	0.43	0.06	3.77	4.92	99.99	--	--
	2480	FLV-133B-O T218-2	1990-11-19	77.4	12.93	0.72	0.03	0.03	0.44	0.06	3.69	4.71	100.01	--	--
	2944	OL92-1028 MAJ T273-8 JEOL	1993-03-03	76.89	12.97	0.73	0.04	0.04	0.45	0.06	3.97	4.85	100	--	--
	2940	OL92-1025	1993-03-03	76.86	12.99	0.68	0.04	0.02	0.45	0.08	3.92	4.96	100	--	--
	2938	OL92-1021 T273-1 JEOL	1993-03-03	76.91	13	0.72	0.03	0.03	0.45	0.06	4	4.81	100.01	--	--
	4550	KCAVV-1_POP1 T431-9	1990-05-12	77.66	12.68	0.72	0.03	0.02	0.43	0.05	3.64	4.77	100	--	--
	34	BT-11A1, T13-6		77.55	12.72	0.69	0.03	0.04	0.43	0.06	3.69	4.78	99.99	37.7167	-118.88416
			Mean (28)	77.3382	12.7521	0.713571	0.0317857	0.0346429	0.439643	0.0621429	3.83	4.79571	99.9979
			1 sigma	0.308666	0.168904	0.0192862	0.00611832	0.0123175	0.00792658	0.00994695	0.114633	0.139641	0.00956736
27A		Carlotta I ash bed, Wildcat Grade ash, 0.79 - 1.45 Ma
	3934	HW692-7 T358-8	1997-03-01	74.83	14.53	1.53	0.26	0.08	1.06	0.19	4.62	2.9	100	38.21430	-121.82
	1272	CARL-1(1) T8-4	1979-03-23	74.39	14.72	1.57	0.26	0.05	1.06	0.2	4.83	2.92	100	40.5728	-124.277
	44	CARL-1(2), T7-3, pd		73.76	15.24	1.59	0.21	0.06	1.06	0.22	4.94	2.92	100	--	--
	5995	Carl-1(3) T593-1	2013-09-23	73.72	14.96	1.55	0.25	0.07	1.08	0.21	5.28	2.87	99.99	40.5728	-124.277
	5996	Carl-1(C) T593-2 (pop1)	2013-09-23	73.86	14.98	1.53	0.25	0.07	1.06	0.21	5.19	2.85	100	--	--
	5998	Carl-1(E) T593-3	2013-09-23	73.81	14.96	1.56	0.26	0.08	1.06	0.21	5.23	2.83	100	--	--
	5930	DCE-DH-005-197.3 (B06)	2012-01-25	75.45	15.08	1.57	0.27	0.08	1.12	0.21	3.52	2.71	100.01	--	--
			Mean (6)	74.26	14.9243	1.55714	0.251429	0.07	1.07143	0.207143	4.80143	2.85714	100
			1 sigma	0.666083	0.233371	0.0221467	0.019518	0.011547	0.0226779	0.0095119	0.613553	0.0734199	0.0057735
27		Ishi Tuff, ~2.5 Ma
	333	RS-2(1), T32-8	--	77.76	12.74	0.82	0.14	0.02	0.75	0.15	3.5	4.12	100	39.83	-121.77
	216	MILL-10, T30-5	--	77.78	12.72	0.8	0.14	0.04	0.75	0.16	3.52	4.09	100	--	--
	5381	PU-16C (04) T527-9	2005-07-12	78.28	12.69	0.81	0.15	0.04	0.75	0.15	3.25	3.88	100	37.30373	-122.40355
	1799	DR87-12 T143-1	1987-06-24	78.15	12.37	0.83	0.14	0.04	0.76	0.14	3.75	3.82	100	36.4714	-120.518
	5379	PU-16A (04) T527-7	2005-07-12	78.33	12.6	0.8	0.15	0.04	0.77	0.15	3.25	3.9	99.99	37.30373	-122.40355
	302	PU-1, T18-1	1978	77.92	12.57	0.78	0.13	0.04	0.75	0.15	3.69	3.97	100	37.3231	-122.402
	334	RS-2(2), T34-6	1978	77.51	12.82	0.81	0.16	0.02	0.74	0.15	3.39	4.4	100	39.83	-121.77
	217	MILL-10A, T30-6	--	77.94	12.61	0.83	0.14	0.02	0.81	0.14	3.63	3.88	100	--	--
	4635	PU-1,7,9AVERAGE	1978	77.89	12.59	0.85	0.14	0.04	0.76	0.17	3.63	3.93	100	--	--
	663	KT-11A, T64-2	1983-09-06	78.47	12.16	0.86	0.14	0.04	0.77	0.16	3.59	3.81	100	36.009	-120.002
	592	RS-2(3), T67-13	1983-11-18	77.97	12.48	0.85	0.14	0.05	0.78	0.13	2.81	4.78	99.99	--	--
	588	PU-1(2), T18-1(2)	06/xx/1983	77.96	12.44	0.85	0.15	0.03	0.78	0.14	3.72	3.94	100.01	--	--
	1876	EH-UCD-PU-1 T148-9	1987-10-27	78.68	12.07	0.81	0.15	0.04	0.77	0.17	3.43	3.89	100.01	--	--
	5380	PU-16B (04) T527-8	2005-07-12	78.31	12.57	0.87	0.16	0.04	0.78	0.16	3.32	3.8	100.01	37.30373	-122.40355
	2541	PU-9B T224-8	1991-04-22	77.68	12.7	0.86	0.15	0.05	0.78	0.18	3.69	3.92	100.01	--	--
			Mean (15)	78.042	12.542	0.828667	0.145333	0.0366667	0.766667	0.153333	3.478	4.00867	100.001
			1 sigma	0.32025	0.210347	0.0269568	0.00833809	0.009759	0.0179947	0.0134519	0.24909	0.262539	0.0063994
26		La Salida ash, 3.06 Ma
	499	C-83-6A, T67-1	1983-11-18	72.5	14.47	2.73	0.27	0.11	0.89	0.29	5.39	3.36	100.01	35.8897	-119.955
	676	BUR-915, T59-B2	1983	72.02	14.46	2.67	0.26	0.11	0.87	0.33	5.66	3.63	100.01	40.77	-112.41
	1587	61186-6 T129-4	1986-08-19	73.33	14	2.71	0.26	0.1	0.86	0.31	5.22	3.21	100	--	--
	2739	BUR-914.2	--	72.8	15.42	2.85	0.28	0.1	0.87	0.31	3.54	3.84	100.01	40.77	-112.41
	2740	BUR-915 HiFe	--	73.05	14.13	2.75	0.25	0.1	0.86	0.32	4.52	4.01	99.99	40.77	-112.41
	363	SSP-2, T19-9	1978	72.25	14.56	2.66	0.24	0.08	0.9	0.32	5.68	3.3	99.99	36.91	-121.61
			Mean (6)	72.6583	14.5067	2.72833	0.26	0.1	0.875	0.313333	5.00167	3.55833	100.002
			1 sigma	0.494749	0.497822	0.0688234	0.0141421	0.0109545	0.0164317	0.0136626	0.831923	0.321211	0.00983192
25		Nomlaki Tuff, 3.30 Ma
	479	758-314, T15-4		77.71	13.03	1.03	0.19	0.03	0.93	0.22	3.55	3.3	99.99	40.475	-122.435
	250	ORO-2(2), T8-10	1978	77.07	13.3	1.04	0.19	0.03	0.92	0.23	3.85	3.37	100	39.53	-121.48
	1084	PS 84 1TN T81-2	1984-09-04	77.89	12.53	1.03	0.19	0.04	0.95	0.21	3.62	3.54	100	--	--
	399	TS-18B, T15-9	--	78	13.02	0.97	0.19	0.02	0.96	0.23	3.37	3.24	100	--	--
	5945	MM-SFEI-8/95-PINOLE-BD31 T588-	2012-05-17	77.52	12.84	1.03	0.18	0.04	0.92	0.21	3.64	3.61	99.99	--	--
	125	GV-78-19, T15-13	1978	77.36	12.75	1.1	0.19	0.03	0.93	0.22	3.92	3.5	100	--	--
	107	GPT-2, T7-14, pd	--	77.14	13.02	1.07	0.19	0.04	0.91	0.21	3.96	3.46	100	--	--
	5950	MM-USGS-J-1-98-SF-47 T588-4(po	2012-05-17	77.68	12.76	1.04	0.18	0.02	0.9	0.21	3.65	3.57	100.01	37.9016	-122.44
	482	758-324(2), T15-3		77.53	12.86	1.14	0.17	0.03	0.95	0.22	3.67	3.43	100	40.475	-122.617
	5286	MNM-DV-14 T519-8	2004-08-24	77.33	12.83	1.07	0.19	0.04	0.95	0.2	3.72	3.68	100.01	--	--
	57	CM-17, T15-5	--	77.01	13.07	1.06	0.2	0.07	0.97	0.23	3.9	3.49	100	--	--
	397	TS-18A, pum., T15-7	--	77.08	13.26	1.06	0.18	0.03	0.97	0.24	3.7	3.48	100	40.24	-122.11
	310	RBW-78-1339E, T11-5	--	77.27	12.97	1.02	0.18	0.03	1.03	0.21	3.71	3.57	99.99	--	--
	481	758-324(1), T19-10	--	77.26	12.75	1.06	0.18	0.02	0.98	0.22	3.99	3.53	99.99	--	--
	243	OLD COW-2, T27-3	--	77.52	12.52	1.03	0.17	0.02	0.93	0.22	3.91	3.68	100	--	--
	5792	TSN1(pop1)-UCD	1978-1979	77.25	12.98	1.09	0.21	0.07	1.03	0.22	3.68	3.48	100.01	40.241	-122.111
	12	BACQ-82-2 (bulk), T46-3	1983	77.7	12.84	0.99	0.18	0.03	1.04	0.2	3.63	3.39	100	--	--
	5947	MM-SFEI-8/95-RED ROCK-BC60 T58	2012-05-17	77.72	12.68	0.98	0.17	0.02	0.89	0.22	3.71	3.61	100	--	--
	522	FS-91, T56-2	1983-07-01	76.95	12.87	1.05	0.19	0.05	0.98	0.21	4.09	3.61	100	--	--
	5799	BH08SB_6(Poletski)	--	77.62	12.75	1	0.18	0.04	0.9	0.2	3.49	3.83	100.01	40.2407,	-122.111
	582	OLIVE-1, T51-4	1983-02-01	77.16	12.81	1.06	0.18	0.03	0.98	0.21	3.95	3.6	99.98	--	--
	5707	JRK-DV-031208-2 T569-8(total)	2009-01-08	77.16	13.02	1.03	0.19	0.06	0.93	0.17	3.55	3.89	100	--	--
	5025	JRK-DV-214 T495-3	2003-03-17	77.11	12.92	1.06	0.18	0.04	0.91	0.21	3.45	4.11	99.99	--	--
	3982	JWH-031297-2 T364-1	05/xx/1997	77.28	12.93	1.07	0.21	0.03	1.03	0.21	3.79	3.45	100	--	--
	4677	BH00SB-18A T457-8	2001-01-18	77.04	12.89	1.1	0.2	0.05	1.03	0.22	3.86	3.61	100	39.1867	-121.815
	657	82W14, T51-3	1983-02-01	77.18	12.66	1.1	0.18	0.05	0.97	0.22	4.07	3.58	100.01	--	--
	2863	AA-3 T264-2	1992-08-20	76.96	12.83	1.1	0.19	0.05	1	0.21	4.26	3.4	100	--	--
	2050	CAES#2 1644 T171-6	1988-09-05	78.18	12.63	1.09	0.18	0.04	0.99	0.2	3.65	3.04	100	--	--
	6518	18-RS-500 POP1 T631-4	2018-08-15	77	12.75	1.05	0.19	0.04	0.88	0.21	3.87	4.02	100.01	--	--
	5952	MM-USGS-J-1-98-SF-28 T588-7	2012-05-17	77.63	12.76	1	0.17	0.05	0.89	0.2	3.62	3.68	100	--	--
	1168	758-324 NOMLAKI T19-10	1984-12-24	77.48	12.47	1.07	0.2	0.04	0.99	0.21	4.03	3.51	100	40.475	-122.617
	1182	OP84-193B t89-12	1985-02-28	77.28	12.77	1.09	0.19	0.05	0.98	0.19	4.07	3.38	100	--	--
	6517	18-RS-500 T631-4	2018-08-15	76.68	12.89	1.08	0.2	0.04	0.96	0.22	3.91	4.02	100	--	--
	1677	85 CG-21 T133-7	1986-10-21	78.36	11.96	0.96	0.19	0.02	1.05	0.21	3.76	3.47	99.98	--	--
	5479	CAES#1 829 T539-9	2006-05-25	77.44	12.7	1.04	0.18	0.05	0.9	0.19	3.56	3.94	100	--	--
	1911	CAES#CAES#1 829.0 T152-5	1988-02-10	77.55	12.48	1.06	0.19	0.03	0.97	0.19	3.92	3.61	100	--	--
	480	758-314D, T1-6, P	1978	77.04	12.84	1.07	0.18	0.05	0.95	0.2	4.07	3.61	100.01	40.475	-122.435
	21	BID-1, T7-5, pd	--	76.64	13.36	1.11	0.18	0.06	1.03	0.23	3.99	3.4	100	--	--
	5954	MM-USGS-J-1-98-SF-3 T588-8(pop	2012-05-17	77.77	12.71	1.02	0.17	0.04	0.87	0.19	3.64	3.58	99.99	--	--
	1844	FLV-21-WW T146-9	1987-08-25	77.21	12.88	1.1	0.22	0.05	0.99	0.21	3.97	3.36	99.99	--	--
	371	TBN-3, T1, N-ASW-106	1978	77.79	12.29	1.1	0.2	0.05	0.99	0.24	3.79	3.55	100	40.2621	-122.093
	3848	758-322 T355-10	01/xx/1997	77.54	12.8	1	0.17	0.03	0.86	0.2	3.73	3.67	100	--	--
			Mean (42)	77.3831	12.809	1.05286	0.186667	0.0392857	0.956905	0.21119	3.79214	3.56786	99.999
			1 sigma	0.372582	0.251656	0.0410999	0.0116172	0.0131396	0.0501455	0.014177	0.199665	0.210893	0.0072615
		Petrified Forest area ash flows (overlying petrified trees)
	3789	8-19-75 (10) T350-4	1992-11-30	69.39	14.86	5.12	0.49	0.11	2.53	0.46	4.12	2.92	100	38.55	-122.64
	3790	8/19/75 (10) minor T350-4	1992-11-30	75.34	13.42	2.91	0.01	0.07	1.17	0.2	2.43	4.46	100.01	38.55	-122.64
	3796	8-19-75 (1) T350-9	1992-11-30	72.81	14.15	3.04	0.22	0.07	1.26	0.27	4.26	3.91	99.99	38.55	-122.64
	3797	8-19-75 (12) T350-10	1992-11-30	73.88	13.83	3.61	0.02	0.08	1.57	0.22	3.03	3.74	99.98	38.55	-122.64
			Mean (4)	72.855	14.065	3.67	0.185	0.0825	1.6325	0.2875	3.46	3.7575	99.995
			1 sigma	2.19283	0.526901	0.877582	0.195	0.0163936	0.538998	0.102804	0.761807	0.551923	0.0111803
		Petrified Forest ash flow (with petrified trees)
	3793	PF-1A T350-7	1992-11-30	75.5	13.9	2.48	0.15	0.03	1.09	0.23	1.52	5.08	99.98	38.55	-122.64
24		Putah Tuff, 3.36 Ma
	475	758-287A, T1-10, P	1978	74.5	13.81	1.82	0.1	0.03	0.74	0.15	4.31	4.54	100	38.491	-122.029	lower
	5214	DW-160-GE T507-10	2003-12-16	74.82	13.68	1.8	0.09	0.02	0.73	0.15	3.84	4.87	100	38.3662	-122.533
	355	SM-ASH-09, T20-11	1979	75.02	13.49	1.79	0.08	0	0.74	0.15	4.15	4.57	99.99	40.528	-124.373	upper
	354	SM-ASH-08, T20-10	1979	76.01	12.87	1.73	0.08	0.01	0.63	0.16	4.09	4.41	99.99	40.529	-124.373	upper
	3559	PVR-1 T329-5	1995-08-30	76.35	14.32	1.82	0.09	0.02	0.76	0.15	2.18	4.31	100	38.488	-122.03	lower
	5961	DWR-SJWD-2 T590-4	2012-05-17	74.88	13.84	1.8	0.09	0.02	0.75	0.16	3.76	4.69	99.99	38.7072	-121.227
	3554	PVR-3 T328-4	1995-08-30	74.55	13.77	1.8	0.09	0.03	0.73	0.14	3.85	5.05	100.01	38.488	-122.03	upper
	3930	758-271B T358-4	2019-03-09	74.74	13.91	1.8	0.08	0.03	0.8	0.15	4.22	4.28	100.01	--	--
	3928	758-236A minor 1sh t358-3	03/xx/1997	74.9	13.78	1.73	0.09	0	0.71	0.15	4.33	4.31	100	--	--
	5255	MRM23-03 T512-5	2004-06-12	75.23	13.46	1.84	0.04	0.04	0.69	0.15	4.11	4.45	100.01	--	--
	466	758-157, T1-1, P	1978	74.43	13.77	1.79	0.1	0.04	0.78	0.16	4.23	4.7	100	37.9891	-122.048
	478	758-292, T7-17, pd	1978	74.9	13.92	1.76	0.09	0.03	0.72	0.14	4.06	4.36	99.98	38.7078	-122.048
	1843	FLV-20-WW T146-8	1987-08-25	74.98	13.62	1.77	0.11	0.03	0.72	0.14	4.03	4.61	100.01	--	--
	1367	T-1-85-KI T104-8	1985-08-26	75.28	13.47	1.73	0.08	0.02	0.74	0.14	3.61	4.92	99.99	37.8606	-121.997
	4988	SGW-TA1a T492-4	2003-01-11	75.02	13.53	1.74	0.09	0.01	0.75	0.14	4	4.71	99.99	--	--
	453	264-I-9, T14-4	--	74.55	13.71	1.87	0.08	0.05	0.7	0.16	4.18	4.69	99.99	39.7474	-122.196	lower
	3532	TPSS-351 POP2 T326-6	1995-07-06	74.77	13.77	1.7	0.09	0.03	0.72	0.14	4.65	4.11	99.98	--	--
	3929	758-236A lofe T358-3	03/xx/1997	77.49	14.41	1.86	0.11	0.05	0.74	0.14	0.6	4.6	100	--	--
	1017	MP-29 (597) T58-8	1984-05-30	75.08	13.46	1.8	0.1	0.03	0.74	0.13	4.09	4.58	100.01	37.8398	-122.013
	5127	DW-137-GE_POP1 T503-8	2003-09-02	76.06	13.46	1.98	0.07	0.04	0.7	0.15	2.5	5.03	99.99	38.5897	-122.642
	1473	WC-2B1 T117-7	1986-03-06	75.18	13.47	1.74	0.09	0.04	0.77	0.14	3.68	4.91	100.02	37.8816	-121.914
	5254	MRM16-03 T512-4	2004-06-12	74.85	13.53	1.95	0.05	0.04	0.78	0.14	3.83	4.82	99.99	--	--
	1406	T-1-85-KI (2) T110-11	1985-09-24	75.3	13.36	1.77	0.08	0.01	0.73	0.13	3.86	4.75	99.99	37.8606	-121.997
			Mean (23)	75.1691	13.67	1.79957	0.0856522	0.0269565	0.733478	0.146087	3.74609	4.62043	99.9974
			1 sigma	0.7058	0.316587	0.0678553	0.0161881	0.0142812	0.0353693	0.00891328	0.875545	0.251387	0.0105388
23		Tuff of Monticello Rd., ash flow, 4.45 Ma
	3846	758-207C T355-8	1997-01-01	75.76	13.12	1.61	0.07	0.02	0.54	0.14	3.68	5.07	100.01	38.3577	-122.208
22		Tuff of Danville, Den Hartog #3-26-89-6, Etchegoin Fm., ~4.8 Ma (4.37 Ma)
	483	758-328(1), T7-18, pd	--	78.42	13.01	1.02	0.16	0.03	0.82	0.19	4.04	2.31	100	37.8188	-121.973
	484	758-328(2), T15-2, low total	--	78.27	12.94	1.03	0.15	0	0.85	0.19	3.8	2.76	99.99	--	--
	677	MP-23, T59-B3	1984	77.18	12.65	0.99	0.16	0.04	0.87	0.19	3.27	4.66	100.01	37.68	-121.84
	2199	FLV-119-WW LT. COL. GLS. T183-	1989-01-25	76.88	12.96	1.07	0.16	0.05	0.89	0.19	3.4	4.41	100.01	--	--
	1554	T-4-86 KI T126-12	1986-07-17	78.12	12.47	1.01	0.16	0.04	0.86	0.17	3.49	3.68	100	37.8625	-121.987
	2747	BUR-996	--	78.38	12.45	1.02	0.18	0.06	0.87	0.19	3.17	3.66	99.98	--	--
	2476	DEN HARTOG #3-26-89-6 T217-3	1990-10-23	77.03	12.31	1	0.16	0.04	0.84	0.17	3.18	5.27	100	36.0	-120.2
	241	OH-2A T7-7	--	76.95	13.21	0.93	0.13	0.05	0.82	0.18	3.53	4.19	99.99	38.0	-123.0
			Mean (8)	77.6538	12.75	1.00875	0.1575	0.03875	0.8525	0.18375	3.485	3.8675	99.9975
			1 sigma	0.698896	0.323243	0.0397986	0.0138873	0.0180772	0.0249285	0.00916125	0.305894	0.980084	0.010351
21		Tuff of Napa, Healdsburg tuff, ~4.7 Ma
	4030	DE-HB-3 T369-5	09/xx/1997	73.78	14.4	3.18	0.1	0.09	0.99	0.18	4.17	3.11	100	38.0296	-121.998
	4031	DE-HB-5 T369-6	09/xx/1997	73.64	14.32	3.25	0.1	0.08	0.96	0.19	4.22	3.24	100	--	--
	3786	COLLINSVILLE J-22 T350-1	12/xx/1996	72.82	14.12	3.25	0.1	0.08	1	0.19	5.36	3.09	100.01	38.09390	-121.853
	5112	MRM55-02 T500-2	2003-06-23	72.83	14.36	3.18	0.1	0.08	1.01	0.2	4.53	3.7	99.99	38.5192	-122.637
	5602	DW-06-KW-07 T557-4	2008-02-29	73.87	15.04	3.21	0.1	0.09	0.95	0.2	3.59	2.95	100	38.3846	-122.6
	5772	DW-183-GE-08 T569-5	2009-01-08	72.24	14.76	3.18	0.1	0.08	0.97	0.19	5.05	3.43	100	38.3641	-122.566
	3966	970213-1 T361-8 (2)	04/xx/1997	73.01	13.88	3.17	0.1	0.08	0.98	0.2	5.47	3.11	100	--	--
	5604	DW-10-KW-07 T557-6	2008-02-29	73.21	15.18	3.23	0.11	0.1	0.99	0.2	3.74	3.25	100.01	38.3796	-122.578
	4095	DE-HB-4 T376-3	1998-01-01	72.19	14.24	3.18	0.1	0.07	0.97	0.19	5.88	3.18	100	38.0296	-121.998
	5136	DW-147-GE T504-1	2003-09-02	72.55	14.43	3.25	0.1	0.09	0.96	0.2	4.92	3.49	99.99	38.5923	-122.877
	4972	JA2002-A T490-3	2002-11-12	72.42	14.54	3.3	0.1	0.06	1	0.18	5.64	2.76	100	38.3653	-122.607
	3932	970213-1 T358-6	03/xx/1997	73.08	14.11	3.11	0.1	0.07	0.99	0.22	5.02	3.31	100.01	--	--
	3845	758-198 T355-7	1997-01-01	72.47	14.34	3.33	0.1	0.08	0.95	0.2	5.47	3.05	99.99	38.3445	-122.247
	4028	758-199A T369-3	1997-09-01	73.75	14.53	3.14	0.07	0.07	0.92	0.17	4.09	3.27	100.01	38.3445	-122.247
	5438	MRM 31-05 T533-3	2005-12-19	72.35	14.4	3.16	0.09	0.08	0.97	0.2	5.52	3.22	99.99	--	--
	4412	JP-UNM-4 T405-9B (hiFe)	1999-03-29	71.84	14.57	3.29	0.1	0.09	0.99	0.21	5.52	3.39	100	--	--
	5603	DW-09-KW-07 T557-5	2008-02-29	73.83	15.01	3.3	0.11	0.08	0.97	0.21	3.32	3.19	100.02	38.3826	-122.569
	3844	758-192 T355-6	1997-01-01	73	14.35	3.16	0.08	0.07	0.86	0.18	5.21	3.08	99.99	38.3425	-122.208
	4581	MRM26-99 T435-7	2000-03-02	72.45	14.32	3.23	0.09	0.07	1.01	0.21	4.92	3.69	99.99	38.5689	-122.773
	1531	HEALDSBURG LOC. 3 T124-4	1986-05-05	72.23	14.39	3.25	0.11	0.09	0.98	0.21	5.1	3.64	100	--	--
	5212	DW-159-GE T507-8	2003-12-16	71.9	14.43	3.23	0.09	0.08	0.96	0.2	5.78	3.34	100.01	38.3685	-122.565
	472	758-199, T1-15, P	1978	72.15	14.63	3.23	0.09	0.08	0.93	0.21	5.36	3.32	100	38.3445	-122.247
	5210	DW-157-GE T507-6	2004-04-20	72.07	14.54	3.19	0.11	0.06	1.03	0.21	5.12	3.67	100	38.36370	-122.585
			Mean (23)	72.7687	14.4735	3.21739	0.0978261	0.0791304	0.971304	0.197826	4.91304	3.28174	100
			1 sigma	0.654428	0.302589	0.056102	0.00951388	0.0099604	0.0354586	0.0124157	0.728912	0.243211	0.00824525
20		Huichica Tuff, 4.76 Ma
	138	H-1, T3,4	--	73.56	14.62	2.29	0.09	0.06	1.05	0.19	4.44	3.7	100	38.2491	-122.387
	456	758-84, T1-12, P	1978	73.35	14.47	2.29	0.1	0.05	1.09	0.18	4.83	3.65	100.01	37.5929	-121.689
	457	758-86, T7-15	1978?	74.18	14.46	2.27	0.11	0.06	1.03	0.18	4.14	3.57	100	37.5929	-121.689
	3444	92SgSJE-83 Major T319-10	1995-02-25	73.29	14.46	2.35	0.09	0.04	1.07	0.18	4.96	3.64	100.08	37.283	-121.766
	146	JCD-1(1), T19-6	--	73.65	14.32	2.25	0.08	0.03	1.06	0.17	4.39	4.04	99.99	36.4128	-121.044
	3525	H-2 T326-1	1995-07-06	73.52	14.41	2.21	0.08	0.05	1.03	0.15	4.52	4.03	100	38.2491	-122.386
	148	JCD-1(3), T19-7	--	73.48	14.35	2.16	0.07	0.04	1.08	0.16	4.5	4.16	100	36.4128	-121.044
	147	JCD-1(2), T3,4, N-ASW-17	--	73.55	14.82	2.14	0.08	0.05	1.02	0.17	4.06	4.11	100	36.4128	-121.044
	4617	JPW_4-15-00-1 T441-4	2000-06-29	74.45	14.33	2.33	0.09	0.06	1.08	0.16	4.35	3.15	100	37.7828	-121.957
			Mean (9)	73.67	14.4711	2.25444	0.0877778	0.0488889	1.05667	0.171111	4.46556	3.78333	100.009
			1 sigma	0.387427	0.160191	0.0721303	0.0120185	0.0105409	0.0254951	0.012693	0.289746	0.329242	0.0271314
19		Lawlor Tuff, 4.834 Ma
	460	758-141A(1), T1-5, P	--	73.02	14.36	2.2	0.1	0.05	0.88	0.18	4.66	4.55	100	37.9805	-121.859
	222	MLG-4, T12-4	--	73.22	14.43	2.17	0.1	0.03	0.88	0.18	4.93	4.05	99.99	--	--
	3524	LAWLOR-2 T325-10	1995-07-06	73.1	14.32	2.21	0.1	0.04	0.86	0.17	4.79	4.41	100	38.0071	-121.94
	579	MLG-3(2), T12-3(2)	1982-12-09	73.45	14.16	2.19	0.1	0.04	0.89	0.17	4.87	4.13	100	--	--
	5401	LAWLOR-1 T530-7	2005-09-07	73.78	14.07	2.13	0.1	0.05	0.85	0.18	4.66	4.19	100.01	38.0071	-121.94
	5535	LAWLOR AVR 43	--	73.79	14.23	2.17	0.1	0.04	0.89	0.17	4.44	4.18	100.01	38.0071	-121.94
	5369	IMP95-03 T526-4	2020-05-31	75.78	14.42	2.14	0.1	0.05	0.88	0.19	3.6	2.84	100	--	--
	462	758-141C, T19-3	--	72.95	14.81	2.19	0.1	0.02	0.85	0.17	4.76	4.14	99.99	37.9805	-121.859
	5454	DW-174-06-GE T538-3	2006-04-13	74.97	14.29	2.18	0.1	0.03	0.85	0.17	2.98	4.43	100	38.3614	-122.62
	4964	MO2AM-110B T489-7	2002-10-26	74.38	14.21	2.16	0.1	0.05	0.91	0.17	4.46	3.55	99.99	--	--
	485	758-329, T7-19, pd, low total	--	75.7	14.65	2.18	0.1	0.03	0.85	0.19	4.01	2.29	100	37.8334	-121.962
	5545	HTH-4 T546-2	2007-03-07	74.02	14.19	2.11	0.1	0.04	0.85	0.19	4.62	3.88	100	--	--
	5452	DW-171-06-GE T538-1	2006-04-13	74.52	14.22	2.17	0.1	0.06	0.88	0.16	3.38	4.52	100.01	38.3641	-122.625
	188	KT-7(2), T5-2	--	73.65	14.3	2.16	0.09	0.04	0.91	0.18	4.69	3.98	100	36.0057	-120.025
	2120	WC-B4B (SILICIC) T175-13	1988-10-28	73.12	14.67	2.13	0.1	0.05	0.89	0.2	4.21	4.64	100.01	37.883	-122.016
	5051	MRM9-02 T497-2	2003-04-23	73.73	14.15	2.18	0.1	0.05	0.86	0.16	4.59	4.18	100	38.48600	-122.728
	465	758-156C, T19-5	--	73.53	14.31	2.14	0.09	0.03	0.91	0.18	4.65	4.16	100	38.0324	-122
	5261	MRM43-03 T513-1	2004-06-12	73.68	14.27	2.21	0.1	0.05	0.92	0.16	4.35	4.26	100	38.4817	-122.647
	3523	LAWLOR-1 T325-9	1995-07-06	73.2	14.29	2.15	0.09	0.04	0.84	0.18	4.83	4.37	99.99	38.0071	-121.94
	3787	COLLINSVILLE J-28 T350-2	12/xx/1996	73.67	14.03	2.2	0.1	0.04	0.91	0.16	4.59	4.32	100.02	38.09390	-121.853
	461	759-141A(2), T19-2	--	73.43	14.26	2.16	0.09	0.04	0.88	0.17	3.67	5.3	100	37.9804	-121.857
	473	758-218E, T1-14, P	--	73.26	14.44	2.17	0.11	0.07	0.9	0.19	4.68	4.18	100	38.10630	-122.102
	2125	WC-B4A T176-7	1988-10-27	73.54	14.13	2.17	0.09	0.05	0.88	0.19	4.06	4.88	99.99	37.883	-122.016
	5257	MRM35-03 T512-7	2004-06-12	73.84	14.26	2.04	0.1	0.05	0.92	0.17	4.27	4.33	99.98	38.4722	-122.623
	486	758-338, T1-3, P	--	73.8	14.46	2.21	0.11	0.05	0.86	0.17	5.36	2.97	99.99	37.7881	-121.854
	186	KT-6, T6-2,	--	74.3	13.59	2.24	0.09	0.05	0.89	0.18	4.61	4.05	100	36.0057	-120.025
	580	MLG-4(2), T12-4(2)	1982-12-09	73.6	14.15	2.2	0.09	0.04	0.86	0.17	4.83	4.05	99.99	--	--
	5284	M03-18 T519-10	2004-08-24	74.09	14.12	2.17	0.1	0.04	0.84	0.16	4.54	3.92	99.98	35.3933	-116.133
	187	KT-7(1), T6-3	--	74.01	13.49	2.22	0.1	0.04	0.94	0.17	4.77	4.25	99.99	36.0057	-120.025
	5262	MRM45-03 T513-2	2004-06-12	73.87	14.22	2.16	0.09	0.04	0.89	0.17	4.52	4.03	99.99	38.4779	-122.641
	221	MLG-3, T12-3	--	73.63	14.24	2.15	0.09	0.02	0.87	0.17	4.87	3.96	100	--	--
	3057	GV93-1 T283-8	1996-07-23	73.49	14.2	2.03	0.1	0.04	0.83	0.17	5.06	4.09	100.01	37.413	-121.142
	1727	TRY-2 T137-9	1987-04-23	74.13	13.82	2.12	0.1	0.05	0.89	0.16	3.91	4.83	100.01	--	--
	5683	HTH-081 T567-4	2009-01-08	74.11	14.56	2.18	0.1	0.05	0.87	0.15	4.64	3.36	100.02	--	--
	231	MONT-1, T9-2		73.56	14.04	2.17	0.09	0.06	0.9	0.19	4.62	4.36	99.99	38.1928	-121.889
	3847	758-218 T355-9	01/xx/1997	73.74	14.41	2.24	0.1	0.04	0.9	0.15	4.3	4.12	100	38.10630	-122.102
	2121	WC-B4B (MAFIC) T17	1988-10-28	73.28	14.57	2.06	0.09	0.04	0.92	0.18	4.14	4.73	100.01	37.883	-122.016
	456	758-84, T1-12, P		73.35	14.47	2.29	0.1	0.05	1.09	0.18	4.83	3.65	100.01	37.5929	-121.689
	3551	MRT-2 T328-1	1995-08-30	73.43	14.34	2.16	0.09	0.03	0.87	0.16	4.31	4.6	99.99	37.87930	-122.013
	2157	WC-B3B T177-12	1988-12-07	73.79	13.92	2.17	0.09	0.07	0.93	0.17	4.3	4.55	99.99	37.883	-122.016
	5546	HTH-5 T546-3	2007-03-07	74.08	14.2	1.99	0.09	0.04	0.88	0.17	4.93	3.63	100.01	--	--
	2183	WC-B3B DK GLS T180-7	1988-12-22	73.74	14.11	2.12	0.08	0.05	0.87	0.17	4.07	4.8	100.01	37.883	-122.016
			Mean (42)	73.7936	14.2471	2.16167	0.0966667	0.0438095	0.886667	0.173095	4.46095	4.13595	99.9995
			1 sigma	0.605643	0.252889	0.055958	0.00611542	0.0108093	0.0415356	0.0113671	0.464489	0.554516
18A		Collinsville ash
	3788	COLLINSVILLE J-36 T350-3	1996-12-01	75.71	13.58	1.35	0.11	0.03	1.01	0.1	3.65	4.46	100	38.0939	-121.853
	2536	BEC-3 T224-3	1991-04-22	75.55	13.84	1.35	0.08	0.04	0.89	0.08	3.81	4.36	100	38.908	-122.038
	2757	BEC-3 T250-2	1992-02-26	75.73	13.3	1.37	0.1	0.04	0.9	0.07	4.1	4.39	100	38.908	-122.038
	2489	BEC-3-PUMICE T219-9	1990-12-21	76.12	13.6	1.28	0.12	0.02	0.87	0.07	3.42	4.49	99.99	38.908	-122.038
	2537	BEC-4 R224-4	1991-04-22	75.41	13.91	1.35	0.1	0.04	0.9	0.09	3.85	4.36	100.01	38.908	-122.038
			Mean (5)	75.704	13.646	1.34	0.102	0.034	0.914	0.082	3.766	4.412	100
			1 sigma	0.266421	0.24162	0.034641	0.0148324	0.00894427	0.0550454	0.0130384	0.251853	0.0597495	0.00707107
18		Roblar Tuff, ~6.2 Ma
	5377	758-105A, T527-5	2020-07-12	75.9	13.68	1.46	0.07	0.03	0.6	0.11	2.91	5.23	99.99	38.0419	-122.31130
	458	758-105, T18-3	--	75.18	13.67	1.45	0.05	0.03	0.58	0.1	3.85	5.09	100	38.0419	-122.262
	55	CDMG 180-81, T26-8	--	75.24	13.49	1.51	0.06	0.03	0.59	0.12	4.48	4.48	100	38.3889	-122.908
	5310	MRM015B-04 T517-2	2004-08-24	75.24	13.59	1.43	0.07	0.02	0.58	0.12	4.31	4.63	99.99	38.4005	-122.678
	53	CDMG 178-81, T26-6	--	74.8	13.99	1.47	0.06	0.04	0.62	0.12	4.5	4.4	100	38.4012	-122.898
	50	CDMG 175-81, T26-3	--	75.3	13.36	1.47	0.06	0.02	0.57	0.12	4.32	4.78	100	38.38	-122.877
	467	758-169G, T1-8, P	--	74.83	13.69	1.48	0.07	0.03	0.58	0.12	4.32	4.89	100.01	38.3077	-122.808
	49	CDMG 174-81, T26-2	--	75.11	13.54	1.46	0.07	0.01	0.57	0.13	4.56	4.55	100	38.3803	-122.877
	5211	DW-151-GE T507-7	2003-12-16	75.18	13.71	1.48	0.07	0.02	0.57	0.11	4.33	4.54	100.01	38.2555	-122.585
	5382	MRM 25-04 T523-4	2020-03-07	75	13.6	1.45	0.06	0.01	0.58	0.11	4.65	4.53	99.99	38.4129	-122.069
	5311	MRM015A-04 T517-3	2004-08-24	75.1	13.66	1.43	0.07	0.03	0.58	0.12	4.15	4.86	100	38.4005	-122.678
	361	SP-5, T19-13	--	75.27	13.65	1.51	0.07	0.01	0.62	0.11	4.39	4.37	100	38.20170	-122.536
	90	DSDP-34-8-6, T48-1	--	75.04	13.61	1.49	0.07	0.03	0.6	0.14	4.45	4.57	100	--	--
	54	CDMG 179-81, T26-7	--	75.18	13.55	1.49	0.06	0.03	0.61	0.14	4.35	4.59	100	38.3909	-122.915
	51	CDMG 176-81, T26-4	--	74.98	13.8	1.43	0.06	0.02	0.56	0.14	4.52	4.49	100	38.3777	-122.883
	4980	JA080402B T491-4	2003-01-11	75.63	13.36	1.39	0.06	0.01	0.58	0.12	3.96	4.86	99.97	38.3187	-122.748
	5299	MRM 12-04 T520-10	2004-12-21	75.57	13.51	1.46	0.06	0.03	0.57	0.11	3.97	4.73	100.01	38.4034	-122.691
	4931	DW-SP-8-2001 T486-3	2002-10-26	75.67	13.84	1.52	0.06	0.03	0.58	0.13	4.31	3.85	99.99	38.1531	-122.46
	52	CDMG 177-81, T26-5	--	74.93	13.53	1.51	0.07	0.03	0.56	0.1	4.58	4.69	100	38.3971	-122.91
	1932	DW-SPB-R-1 T163-2	1988-05-14	75.17	13.56	1.51	0.07	0.03	0.59	0.14	4.17	4.76	100	37.9924	-122.306
	4659	MRM00-19 T444-5	2000-11-03	75.52	13.59	1.49	0.07	0.03	0.6	0.12	3.67	4.91	100	38.4994	-122.856
	48	CDMG 173-81, T26-1	--	74.93	13.6	1.54	0.07	0.03	0.59	0.15	4.36	4.74	100.01	38.38070	-122.87670
	4979	JA080402A T491-3	2003-01-11	75.41	13.51	1.52	0.07	0.03	0.6	0.13	3.83	4.9	100	38.3187	-122.748
	4961	JPW-2-9-02-1 T489-4	2002-10-26	75.65	13.65	1.52	0.07	0.02	0.6	0.11	3.72	4.67	100.01	37.7809	-121.862
	4930	DW-SP-7-2001 T486-2	2002-10-26	75.9	13.8	1.56	0.07	0.03	0.6	0.12	4.65	3.28	100.01	38.1732	-122.472
	4772	758-369(UR) T465-5	2001-07-18	75.26	13.36	1.44	0.06	0.02	0.57	0.11	3.9	5.27	99.99	37.7751	-121.828
	4785	JPW-6-30-00-2B T466-9	2001-07-23	75.59	13.4	1.46	0.07	0.02	0.56	0.11	3.66	5.13	100	37.78750	-121.92
			Mean (26)	75.2807	13.6037	1.47889	0.0655556	0.0248148	0.585556	0.120741	4.18037	4.65889	99.9993
			1 sigma	0.306744	0.149799	0.0389609	0.0057735	0.00802418	0.0171718	0.012987	0.396441	0.40303	0.00873804
17		Tuff with rock fragments of Vitt (1936)
	487	758-339CR, T1-4, P	--	75.82	13.93	1.61	0.19	0.04	0.83	0.2	4.09	3.29	100	37.7942	-121.825
	1552	SIMP-3 T126-10	1986-07-17	77.19	13.5	1.59	0.17	0.04	0.85	0.2	3.19	3.26	99.99	37.8652	-121.983
	4778	JPW-6-30-00-1B T465-8	2001-07-23	76.27	13.73	1.53	0.17	0.03	0.82	0.19	4	3.26	100	37.7812	-121.927
	4786	JPW-6-30-00-2C T466-10	2001-07-23	75.99	13.49	1.55	0.17	0.04	0.78	0.18	3.16	4.64	100	37.78750	-121.92
	492	758-373, T18-2	--	74.92	13.58	1.51	0.15	0	0.82	0.19	3.59	5.24	100	37.773	-121.827
			Mean (5)	76.038	13.646	1.558	0.17	0.03	0.82	0.192	3.606	3.938	99.998
			1 sigma	0.818639	0.185553	0.0414729	0.0141421	0.0173205	0.0254951	0.0083666	0.436383	0.939053	0.00447214
		PINOLE TUFF COMPLEX, 16-12, > 6.2 Ma , <6.3 Ma
16		Heterogenous tuff w/ scoria bombs, mafic
	4773	758-369(2)B T465-6	2001-07-18	53.18	17.39	9.26	6.86	0.17	11.25	1.5	4.12	0.53	104.26	37.7751	-121.828
	4944	DW-GE T487-7	2002-10-26	51.18	15.4	9.83	6.56	0.18	11.2	1.44	3.79	0.43	100.01	--	--
			Mean (2)	52.18	16.395	9.545	6.71	0.175	11.225	1.47	3.955	0.48	102.135
15		Heterogenous tuff w/scoria bombs, silicic 1
	5378	758-109A T527-6	2005-07-12	73.58	14.57	2.88	0.21	0.08	1.12	0.26	3.6	3.71	100.01	38.0107	-122.262
	4926	MRM9-01B T484-1	2002-10-26	74.47	14.37	2.87	0.22	0.05	1.14	0.25	2.42	4.22	100.01	38.5697	-122.65450
	5277	MRM36-04 T517-4	2004-08-24	72.53	14.57	3.01	0.22	0.06	1.17	0.27	3.2	4.96	99.99	38.3944	-122.668
	4777	758-369(2)S_all T465-7	2001-07-23	71.53	14.56	2.67	0.2	0.07	1.01	0.26	4.67	5.03	100	37.7751	-121.828
	4880	MRM-38C-01 T476-8	2002-04-02	73.13	13.8	2.93	0.2	0.06	1.17	0.29	4.55	3.86	99.99	38.7392	-122.396
	1553	T-2-86 KI LOW K FRACT T126-11	1986-07-17	73.06	14.22	2.92	0.23	0.08	1.08	0.29	4.71	3.41	100	37.8597	-121.998
			Mean (6)	73.05	14.3483	2.88	0.213333	0.0666667	1.115	0.27	3.85833	4.19833	100
			1 sigma	0.988393	0.30354	0.114193	0.0121106	0.0121106	0.061563	0.0167332	0.941433	0.670326	0.00894427
15		Heterogenous tuff w/scoria bombs, silicic 2
	4774	758-369(2)S_pop1 T465-7	2001-07-23	71.6	14.17	2.98	0.09	0.08	0.84	0.24	4.72	5.29	100.01	37.7751	-121.828
	5260	MRM40-03 T512-10	2004-06-12	72.44	14.53	2.98	0.09	0.08	0.94	0.21	5.53	3.19	99.99	38.4776	-122.644
			Mean (2)	72.02	14.35	2.98	0.09	0.08	0.89	0.225	5.125	4.24	100
14		Heterogenous tuff w/scoria bombs, silicic 3
	4775	758-369(2)S_pop2 T465-7	2001-07-23	69.75	15.67	3.1	0.46	0.07	1.74	0.38	4.88	3.94	99.99	37.7751	-121.828
	4771	MRM-00-35 T465-4	2001-07-18	69.82	15.61	3.08	0.46	0.07	1.75	0.38	4.81	4.01	99.99	38.5912	-122.681
			Mean (2)	69.785	15.64	3.09	0.46	0.07	1.745	0.38	4.845	3.975	99.99
13		Heterogenous tuff w/ scoria bombs, silicic 4
	4776	758-369(2)S_pop3 T465-7	2001-07-23	72.59	14.13	2.17	0.09	0.08	0.62	0.19	4.41	5.72	100	37.7751	-121.828
	5335	DW-35-Na-04B T23-7	2005-03-07	73.54	14.48	2.28	0.09	0.05	0.63	0.18	3.44	5.32	100.01	38.2533	-122.373
			Mean (2)	73.065	14.305	2.225	0.09	0.065	0.625	0.185	3.925	5.52	100.005
12		Rodeo Tuff, ~6.3 Ma
	468	758-178B, T1-13, P	1978	71.27	14.39	3.56	0.09	0.08	1.09	0.23	5.79	3.49	99.99	38.033	-122.267
	489	758-365(1), T1-2, P	1978	71.89	15.17	3.53	0.1	0.07	1.07	0.23	2.82	5.12	100	38.033	-122.267
	490	758-365(2), T18-4	1978	72.06	14.9	3.55	0.11	0.05	1.09	0.22	3.03	4.97	99.98	38.033	-122.267
	3925	758-104 (a) T358-1	03/xx/1997	73.24	14.73	3.48	0.11	0.07	1.09	0.22	2.08	4.99	100.01	38.0378	-122.271
	5279	MRM40-04 T517-6	2004-08-24	71.45	14.43	3.47	0.05	0.1	1.1	0.25	5.82	3.34	100.01	38.3893	-122.66
	5376	758-104B T527-4	2005-07-12	71.46	14.75	3.35	0.11	0.08	1.05	0.23	4.23	4.74	100	38.03780	-122.271
	3931	758-374 T358-5	03/xx/1997	71.87	14.46	3.39	0.11	0.08	1.06	0.24	3.48	5.31	100	37.77270	-121.82770
	5334	DW-35-Na-04A T523-6	2005-03-07	72.11	14.88	3.42	0.12	0.06	1.1	0.24	4.54	3.53	100	38.2533	-122.373
	3673	758-232 #2 T339-1	11/xx/1996	73.08	15.03	3.53	0.12	0.08	1.11	0.24	3.02	3.79	100	38.2514	-122.378
	3660	758-232 T339-1	1996-11-03	73.48	15.02	3.5	0.11	0.09	1.12	0.22	2.83	3.65	100.02	38.2514	-122.378
	491	758-368, T18-12	--	73.46	13.18	3.62	0.11	0.07	1.03	0.24	5.38	2.91	100	--	--
	470	758-190A, T1-11, P	--	71.44	14.53	3.88	0.12	0.1	1.01	0.25	5.65	3.02	100	38.35270	-122.224
			Mean (12)	72.2342	14.6225	3.52333	0.105	0.0775	1.07667	0.234167	4.05583	4.07167	100.001
			1 sigma	0.844947	0.522392	0.135669	0.0193061	0.0148477	0.0333939	0.0108362	1.35075	0.884676	0.00996205
11		McGuire Pk upper ash, in Briones Fm., ash in Modelo Fm., ash in Purisima Fm., ~9 Ma
	2402	MGP-16 T206-6	1990-05-15	76.07	12.95	1.33	0.21	0.03	0.84	0.27	3.54	4.77	100.01	37.5486	-121.84
	1591	MOD-6 T130-2	1986-09-19	76.26	12.71	1.33	0.2	0.03	0.86	0.27	3.66	4.67	99.99	34.3410	-118.974
	5156	MOD-6 T130-2(2)	2003-09-02	75.98	13.05	1.36	0.2	0.04	0.85	0.28	3.41	4.84	100.01	34.3410	-118.974
	2398	PU-17 T206-2	1990-05-15	76.89	13.31	1.27	0.21	0.03	0.85	0.25	4.1	3.08	99.99	37.3163	-122.331
	2371	PU-17 T201-2	1989-10-12	77.09	13.55	1.31	0.19	0.04	0.84	0.25	3.2	3.53	100	37.3163	-122.331
			Mean (5)	76.458	13.114	1.32	0.202	0.034	0.848	0.264	3.582	4.178	100
			1 sigma	0.501069	0.325085	0.0331662	0.0083666	0.00547723	0.0083666	0.0134164	0.336036	0.814905	0.01
10		Rheem Tuff, Contra Costa Fm, correlates ? w/ Volcanic Neck, nr. Roblar, Sonoma Co., ~10 Ma
	3089	92CB-3673 T288-2	1993-08-24	79.35	12.92	0.96	0.05	0.02	0.44	0.08	4.38	1.79	99.99	37.8668	-122.11
	2543	RQ-2 T225-2	1991-04-22	77.2	12.52	1.06	0.03	0.02	0.44	0.08	3.71	4.95	100.01	38.3250	-122.741
			Mean (2)	79.35	12.92	0.96	0.05	0.02	0.44	0.08	4.38	1.79	99.99
9		Black Diamond Park ash in unnamed formation above Neroly, ~10 Ma
	463	758-141E, T20-8		75.63	12.05	2.37	0.11	0.02	0.81	0.34	2.66	6.01	100	37.98005	-121.86059
	2810	M91GC-33 T257-2	1992-05-14	75.35	12.29	2.33	0.13	0.04	0.81	0.34	2.7	6.01	100	--	--
	4139	qe-6 (perkins)	--	75.98	11.97	2.39	0.12	0.03	0.81	0.33	2.12	6.25	100	--	--
	1774	QE-6 T141-9	1987-05-27	75.97	12.03	2.29	0.14	0.04	0.8	0.34	2.43	5.96	100	--	--
	1345	BE-251 (?) T106-9	1985-08-29	75.46	12.13	2.38	0.1	0.04	0.85	0.34	1.99	6.71	100	--	--
	1782	QC-3 T140-15	1987-05-27	75.52	12.12	2.35	0.13	0.04	0.83	0.35	2.58	6.08	100	--	--
	2395	M89TH-37 T205-5	1990-04-17	75.81	12.14	2.36	0.1	0.03	0.8	0.32	2.75	5.69	100	--	--
	1048	ALCAN-1 T79-7	1984-07-27	75.94	12.02	2.18	0.12	0.04	0.81	0.34	2.42	6.13	100	--	--
	4640	JMZ-PV-D T442-4	2000-08-03	76.03	12.28	2.28	0.12	0.04	0.81	0.35	1.65	6.44	100	--	--
	1327	BE-18 T105-6	1985-08-29	75.8	11.99	2.28	0.12	0.04	0.83	0.35	2.2	6.39	100	--	--
	3449	1-8-156JB T319-5	1995-02-25	75.39	12.22	2.4	0.12	0.04	0.82	0.32	2.87	5.83	100.01	--	--
	3561	TC90-20 (47)	--	75.39	12.06	2.35	0.1	0.03	0.81	0.31	2.7	6.24	99.99	--	--
			Mean (12)	75.6892	12.1083	2.33	0.1175	0.0358333	0.815833	0.335833	2.4225	6.145	100
			1 sigma	0.260784	0.108446	0.0628129	0.0128806	0.00668558	0.0144338	0.0131137	0.365268	0.280859	0.00426401
8		Alves 2 ash at Neroloy/Cierbo Fms. contact; CPT XI ash, 11.31 Ma
	2058	ALVES-1 T170-6	1988-09-03	76.33	12.12	2.08	0.05	0.03	0.65	0.23	3.24	5.28	100.01	37.9	-121.9
	2414	GREFCO-1 T208-7	1990-05-24	76.88	12.18	2.08	0.05	0.03	0.63	0.23	2.81	5.1	99.99	--	--
	2089	ALVES-1 (2) T173-12	1988-10-06	77.06	12.12	2.05	0.05	0.03	0.65	0.22	2.7	5.12	100	37.9	-121.9
	6326	GREFCO-1 T615-1	2016-08-01	78.26	12.72	2.01	0.04	0.06	0.65	0.23	1.64	4.37	99.98	--	--
	1335	BE-26 T105-14	1985-08-29	75.95	11.97	2	0.06	0.03	0.62	0.22	1.82	7.33	100	--	--
	3569	TC89-27c	--	76.61	11.96	2.02	0.05	0.03	0.61	0.21	2.31	6.19	99.99	--	--
			Mean (6)	76.8483	12.1783	2.04	0.05	0.035	0.635	0.223333	2.42	5.565	99.995
			1 sigma	0.796377	0.279744	0.0352136	0.00632456	0.0122474	0.0176068	0.00816497	0.613743	1.04205	0.0104881
7		Alves Ranch ash 1 in middle part of the Cierbo Fm.; Coal Valley ash, 11.51 Ma
	3557	MRT-3A T329-3 - Cierbo, SW side Mt. Diblo	1995-08-30	78.73	13.58	0.58	0.08	0.07	0.54	0.09	2.31	4.02	100	37.9	-121.9
	3558	MRT-3A T329-3 - Cierbo, SW side Mt. Diblo	1995-08-30	78.67	13.58	0.58	0.08	0.07	0.54	0.09	2.34	4.05	100	37.9	-121.9
	5366	NA-30C T526-8 - Naples Bech, S. Calif., Mont.	2020-05-31	78.46	13.08	0.54	0.09	0.07	0.55	0.09	2.18	4.93	99.99	--	--
	3023	2379-1JA T280-2 - NW Nevada	1993-06-14	76.99	13.12	0.54	0.07	0.06	0.55	0.09	3.39	5.2	100.01	--	--
	5365	NA-51A T526-7 - Naples Beach, S. Calif., Mont.	2020-05-31	78.55	13.1	0.52	0.09	0.07	0.53	0.09	2.23	4.83	100.01	--	--
	3085	920609-2 T287-6 - Cierbo, NE side Mt. Diablo	1993-08-24	77.97	13.25	0.55	0.08	0.06	0.54	0.1	2.83	4.61	99.99	--	--
	1337	BE-25 T106-2 - Aldrich Sta., Nev.	1985-08-29	77.14	12.68	0.56	0.07	0.07	0.54	0.1	1.4	7.44	100	--	--
			Mean (7)	78.0729	13.1986	0.552857	0.08	0.0671429	0.541429	0.0928571	2.38286	5.01143	100
			1 sigma	0.732501	0.314241	0.0221467	0.00816497	0.0048795	0.00690066	0.0048795	0.612637	1.15769	0.00816497
6		La Serena Rd. ash in Cierbo Fm. near Alamo, upper; Browns Hill ash, 11.66 Ma
	3090	92CB-3677 T288-1	1993-08-24	76.9	12.97	0.86	0.12	0.06	0.57	0.15	3.3	5.07	100	37.838	-122.033
	4145	i88-48 (perkins)	--	77.3	12.51	0.87	0.13	0.05	0.58	0.15	2.94	5.47	100	--	--
	3392	2-96-43J T314-6	1995-01-09	77.11	12.45	0.89	0.13	0.05	0.57	0.16	2.95	5.74	100.05	--	--
			Mean (3)	77.1033	12.6433	0.873333	0.126667	0.0533333	0.573333	0.153333	3.06333	5.42667	100.017
5		La Serena Rd. ash in Cierbo Fm., near Alamo; lower; Bear Cr. Ash; Rainier Mesa ash, 11.72 Ma
	3087	92CB-3676 T287-8	1993-08-24	77.77	13.07	0.61	0.05	0.06	0.37	0.09	2.97	5	99.99	37.8382	-122.035
	5153	DPB-14 T22-5(2)	2003-09-02	78.22	12.97	0.61	0.05	0.06	0.38	0.09	3.13	4.49	100	--	--
	4146	i88-47 (perkins)	--	77.08	12.46	0.6	0.06	0.06	0.37	0.08	2.32	6.97	100	--	--
	4630	ALAMO-1 T441-5	2000-06-29	77.76	12.85	0.62	0.06	0.06	0.4	0.12	3.02	5.12	100.01	37.8381	-122.036
	6521	RW-BCR-1 T631-1	2018-08-15	76.79	13.8	0.68	0.06	0.05	0.42	0.12	2.71	5.37	100	37.9177	-122.18140
	1341	BE-62 T106-5	1985-08-29	77.36	12.59	0.58	0.05	0.06	0.4	0.11	1.81	7.04	100	--	--
	2445	DPB-14 T211-5	1990-08-14	77.87	13.14	0.58	0.06	0.07	0.39	0.09	3.34	4.45	99.99	--	--
			Mean (7)	77.55	12.9829	0.611429	0.0557143	0.06	0.39	0.1	2.75714	5.49143	99.9986
			1 sigma	0.496387	0.436948	0.0338765	0.00534522	0.0057735	0.0182574	0.0163299	0.529708	1.08519	0.00690066
4		Tesla Rd. ash; Aldrich Hill 2 ash, 12.01 Ma
	6299	Cierbo-Tesla-1 M T612-2	2016-05-09	78.73	12.85	0.82	0.07	0.07	0.46	0.14	2.35	4.51	100	37.64939	-121.64003
	1342	BE-15-A1 T106-6	1985-08-29	77.12	12.52	0.82	0.06	0.07	0.48	0.14	2.68	6.11	100	--	--
	4149	i88-88 (perkins)	--	76.56	12.44	0.86	0.07	0.07	0.46	0.14	2.32	7.07	99.99	--	--
	5962	BE-15A1 T590-6	2012-05-17	76.87	12.74	0.87	0.07	0.07	0.48	0.14	2.49	6.26	99.99	--	--
	6300	Cierbo-Tesla-1 NM T612-3	2013-05-09	77.35	12.62	0.82	0.07	0.08	0.48	0.13	3.81	4.65	100.01	--	--
			Mean (5)	77.326	12.634	0.838	0.068	0.072	0.472	0.138	2.73	5.72	99.998
			1 sigma	0.837992	0.164864	0.0248998	0.00447214	0.00447214	0.0109545	0.00447214	0.620282	1.10399	0.0083666
3		McGuire Peaks, lower ash in Briones Fm., 13.4 Ma
	2400	MGP-14A T206-4	1990-05-15	77.56	12.7	0.68	0.09	0.04	0.54	0.11	2.98	5.3	100	37.54041	-121.82977
	2401	MGP-14C T206-5	1990-05-15	77.48	12.72	0.67	0.1	0.05	0.52	0.11	3.06	5.28	99.99	37.54041	-121.82977
			Mean (2)	77.52	12.71	0.675	0.095	0.045	0.53	0.11	3.02	5.29	99.995
2		Tephra Layer N-6, Valley Springs Fm., 28.9 Ma
	2117	N-6 T175-10	1988-10-28	77.13	13.06	0.92	0.05	0.07	0.52	0.09	2.76	5.39	99.99	37.309	-121.104
	127	GV-78-21, T15-15	1978	77.16	12.94	0.92	0.06	0.06	0.52	0.08	3.07	5.18	99.99	--	--
	120	GV-77-3, T15-11	1978	77.13	12.78	0.91	0.06	0.07	0.52	0.08	3.01	5.44	100	--	--
	134	GV-78-34A, T16-7	1978	77.1	12.88	0.92	0.04	0.05	0.51	0.08	3.04	5.38	100	--	--
	117	GV-76-C16, T22-1	1978	76.93	12.75	0.9	0.05	0.06	0.59	0.09	3.38	5.25	100	--	--
			Mean (5)	77.09	12.882	0.914	0.052	0.062	0.532	0.084	3.052	5.328	99.996
			1 sigma	0.0919239	0.125379	0.00894427	0.0083666	0.0083666	0.0327109	0.00547723	0.220839	0.10849	0.00547723
1		Kirker Tuff, Mt. Diablo, E. Diablo Range, 29.1 Ma
	3033	KIRK-1 crse T281-8	1993-06-22	76.1	12.48	2.16	0.01	0.07	0.72	0.14	3	5.32	100	37.981	-121.88
	3395	94CB 4054 T316-1	1995-01-06	75.71	12.56	2.1	0.01	0.07	0.73	0.14	3.44	5.25	100.01	37.9866	-121.917
	3034	KIRK-1 fine T281-8	1993-06-22	76.33	12.54	2.15	0.01	0.06	0.73	0.13	2.77	5.29	100.01	37.981	-121.88
	136	GV-80-11(2), T22-2	1981	76.57	12.6	2.18	0.01	0.04	0.71	0.15	2.83	4.91	100	37.301	-121.102
	1927	87-35-SUJ T158-15	1988-03-16	76.09	12.33	2.15	0.01	0.07	0.72	0.15	2.57	5.91	100	44.28	-113.76
	3916	SUJ95-28 SJANECKE	1995	76.59	12.19	2.24	0.01	0.06	0.73	0.14	2.04	5.99	99.99	--	--
	135	GV-80-11(1), T30-2	1981	76.94	12.57	2.2	0.01	0.05	0.69	0.16	2.44	4.95	100.01	37.301	-121.102
			Mean (7)	76.3329	12.4671	2.16857	0.01	0.06	0.718571	0.144286	2.72714	5.37429	100.003
			1 sigma	0.406641	0.151626	0.0441318	0	0.011547	0.0146385	0.009759	0.442407	0.42567	0.00755929
Note: Some sample analysis dates are not available. Coordinates (datum NAD 27) are provided for samples in the study area, but not for correlatives outside of northern California.
-- Information not available
